# Supplementary material
Source: Springer Nature journal article supplement (https://www.springermedizin.de/resource/supplementary/12943_2006_207_MOESM1_ESM.pdf/9553676)

**A**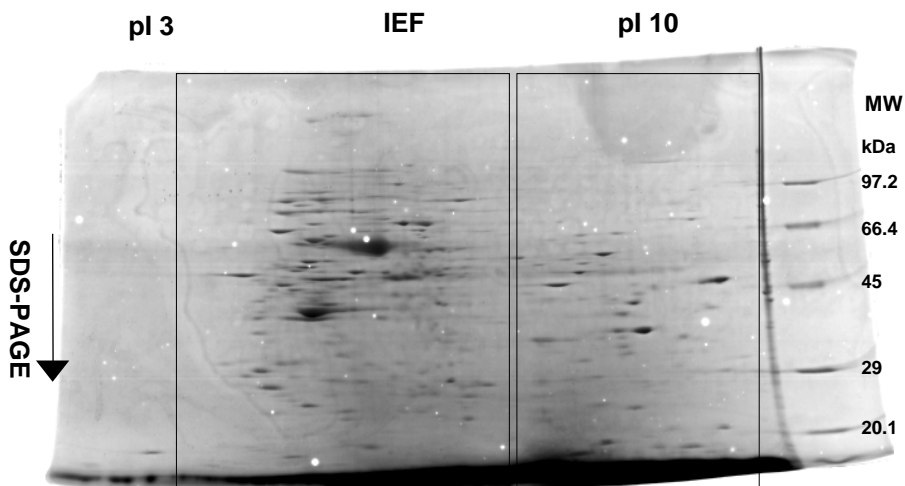**B**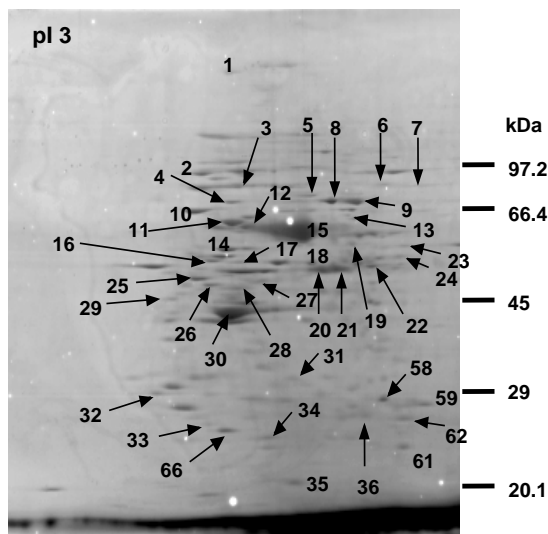**C**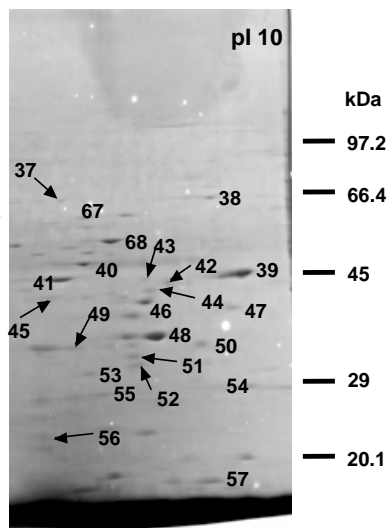

Supplement: MOESM1 [file 9553676]
